# Supplementary material for: Computational design of helical artificial metallopeptides: from sequence to activity in Pd-peptide systems
Source: Royal Society of Chemistry journal article supplement (doi:10.1039/d5qi01794g), 2025-10-17
Supplement: d5qi01794g1.pdf [file d5qi01794g1.pdf]

*Supporting Information for the Article*

Computational Design of Helical Artificial  
Metallopeptides: From Sequence to Activity  
in Pd-Peptide Systems

*Anton V. Domnin,<sup>1</sup> Yaroslav V. Solovev,<sup>2</sup> Denis S. Syrko<sup>3</sup>, Andrey V. Golovin<sup>2,4,5</sup>,*

*Robert A. Evarestov,<sup>1</sup> Mikhail V. Polynski<sup>\*6</sup>*

<sup>1</sup> Quantum Chemistry Department, Institute of Chemistry, St. Petersburg State University,  
Universitetsky Prospekt 26, Saint Petersburg 198504, Russia.

<sup>2</sup> M.M. Shemyakin and Yu.A. Ovchinnikov Institute of Bioorganic Chemistry of the Russian  
Academy of Sciences, Miklukho-Maklaya 16/10, Moscow 117997, Russia.

<sup>3</sup> D. Mendeleev University of Chemical Technology of Russia, Miusskaya Ploshchad, 9, building  
1, Moscow, 125047, Russia.

<sup>4</sup> Faculty of Bioengineering and Bioinformatics, Lomonosov Moscow State University,  
Leninskie Gory 1, building 73, Moscow 119234, Russia

<sup>5</sup> Department of Computational Biology, Sirius University of Science and Technology, 354340  
Sirius, Russia

<sup>6</sup> Department of Chemical and Biomolecular Engineering, National University of Singapore, 4  
Engineering Drive 4, Singapore 117585, Singapore.

**Corresponding Author**

<sup>\*</sup> [polynskimikhail@gmail.com](mailto:polynskimikhail@gmail.com), [mvp@nus.edu.sg](mailto:mvp@nus.edu.sg).

## Table of Contents

|     |                                    |    |
|-----|------------------------------------|----|
| S1. | Supplementary Figures .....        | S3 |
| S2. | Symmetry Reduction Procedure ..... | S4 |

## S1. Supplementary Figures

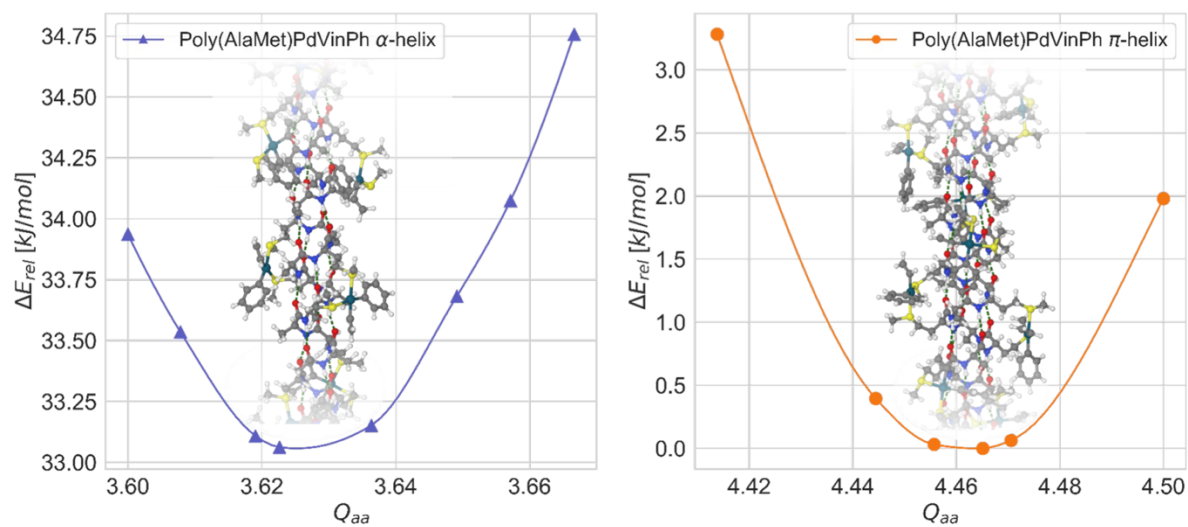

Figure S1. Potential energy surfaces near the minima of the  $\pi$ - and  $\alpha$ -helical conformations of  $[\text{PhVinPd}(\text{Met-Ala})_2]_n$ .

## S2. Symmetry Reduction Procedure

If a monomer in the chain consists of a single amino acid, it is evident that  $Q$  corresponds to the number of amino acid residues per turn ( $Q_{aa}$ ). However, when a monomer comprises multiple amino acids, an analogous mapping is not always straightforward. To address this, we will elaborate further on this specific case when the object's symmetry group is defined by a screw axis.

Suppose we have a structure described by a screw axis  $L_0$  with defined parameters ( $Q_0, q_0, r_0, f_0$ ) and monomer  $M_0$ . To replicate this structure using a new monomer  $M^N$  (repeated  $N$  times), we need to determine the generator of the new symmetry group and define the structure of the new monomer  $M^N$ , enabling subsequent modifications to its configuration.

The structure of the new monomer  $M^N$  is simply determined by applying the corresponding symmetry operations to the original monomer, namely:

$$\begin{aligned}
 M^N &= \sum_{x=0}^{x=N-1} M_0(C_Q|f)^x \\
 &= [M_0(C_Q|f)^0, M_0(C_Q|f)^1, M_0(C_Q|f)^2, \dots, M_0(C_Q|f)^{N-1}] \\
 &= [M_0, M_1, M_2, \dots, M_{N-1}]
 \end{aligned} \tag{s1}$$

Square brackets here denote a collection of atoms. Thus, the monomer  $M^N$  will contain  $N$  times more atoms than the original  $M_0$ . Once the structure of the new monomer is obtained as a collection of fragments from the original, it becomes straightforward to modify each resulting fragment  $M_x$  to achieve the desired structure.

To determine the parameters  $q_N, r_N, f_N$  of the new group, we can refer to the following relationships:

$$\frac{1}{Q_N} = \left\{ \frac{N}{Q_0} \right\} \text{ or } 1 \quad (\text{s2a})$$

$$f_N = Nf \quad (\text{s2b})$$

Here,  $\left\{ \frac{N}{Q_0} \right\}$  denotes the fractional part of the number. If the result is an integer, 1 is used instead of

0. Using relationships 1b, 4 (main text), s2a, and s2b, we can derive the equations linking the original group parameters  $(q, r, f)$  to those of the group after scaling up the monomer:

$$q_N = \begin{cases} q/N, & \text{for } q \bmod N = 0 \text{ and } N < q \\ 1, & \text{for } N \bmod q = 0 \text{ and } N \geq q \\ q/\text{GCD}(q, N), & \text{otherwise} \end{cases} \quad (\text{s3a})$$

$$r_N = \begin{cases} 1, & \text{for } N \bmod q = 0 \text{ and } N \geq q \\ q_N \left\{ \frac{Nr}{q} \right\}, & \text{otherwise} \end{cases} \quad (\text{s3b})$$

$$t_N = \begin{cases} t, & \text{for } q \bmod N = 0 \text{ and } N < q \\ Nt/q, & \text{for } N \bmod q = 0 \text{ and } N \geq q \\ Nt/\text{GCD}(q, N), & \text{otherwise} \end{cases} \quad (\text{s3c})$$

These relationships are sufficient to determine the parameters of the new group. Thus, knowing the symmetry group and structural parameters allows us to construct a system with effectively the same structure but a modified monomer size. In this case,  $Q_0$  serves as  $Q_{aa}$  (the number of amino acid residues per turn), while  $f_0$  represents the average shift of amino acids within the new monomer, and  $h_0$  corresponds to the average height of a turn composed not of the new monomer but of individual amino acids. These characteristics are explicitly used in subsequent sections of this work.
