# Supplementary material for: Computational design of helical artificial metallopeptides: from sequence to activity in Pd-peptide systems
Source: Royal Society of Chemistry journal article supplement (doi:10.1039/d5qi01794g), 2025-10-17
Supplement: d5qi01794g2.zip [file 0data.xlsx]

## Sheet: Met_Ala
angle, deg	q	p	r	band_gap, eV	shift, dimer, A	shift_mon, A	h, A	t, A	tot. energy kJ/mol	RelEnergy kJ/Mol	angle_dim, deg	angle_mono, deg	dimers_per_turn	monomers_per_turn
150	12	5	5	4.0371	2.23499	1.11749	5.36397	26.8198	-2.5469e+06	24.3705	150	75	2.4	4.8
152.308	26	19	11	4.026	2.27088	1.13544	5.36753	59.0429	-2.54691e+06	18.7218	152.308	76.154	2.36363	4.72726
154.286	7	5	3	4.0157	2.28849	1.14425	5.33981	16.0194	-2.54691e+06	13.7835	154.286	77.143	2.33333	4.66666
156.522	23	7	10	3.9935	2.29891	1.14946	5.2875	52.875	-2.54692e+06	8.69623	156.522	78.261	2.3	4.59999
158.4	25	16	11	3.9657	2.30381	1.15191	5.23594	57.5953	-2.54692e+06	5.15236	158.4	79.2	2.27273	4.54545
160.435	92	9	41	3.9366	2.30577	1.15288	5.17391	212.13	-2.54692e+06	2.51363	160.435	80.2175	2.2439	4.4878
161.379	29	9	13	3.9217	2.30688	1.15344	5.14612	66.8996	-2.54692e+06	1.88514	161.379	80.6895	2.23077	4.46155
162.581	31	20	14	3.9052	2.30786	1.15393	5.11027	71.5437	-2.54692e+06	1.5761	162.581	81.2905	2.21428	4.42856
163.636	11	9	5	3.8975	2.30914	1.15457	5.0801	25.4005	-2.54692e+06	1.96275	163.636	81.8182	2.2	4.4
165	24	11	11	3.8872	2.31259	1.15629	5.04565	55.5022	-2.54692e+06	3.41298	165	82.5	2.18182	4.36364
166.154	13	11	6	3.8833	2.31673	1.15836	5.01958	30.1175	-2.54692e+06	5.23768	166.154	83.0769	2.16667	4.33333
168	15	13	7	3.8769	2.32794	1.16397	4.98844	34.9191	-2.54691e+06	9.34271	168	84	2.14286	4.28571
170.526	19	17	9	3.6348	2.37817	1.18908	5.02058	45.1852	-2.54691e+06	15.1964	170.526	85.263	2.11112	4.22223
172.174	23	21	11	3.5722	2.39259	1.19629	5.00268	55.0295	-2.54691e+06	18.7741	172.174	86.087	2.09091	4.18182
173.793	29	27	14	3.8386	2.5831	1.29155	5.35071	74.91	-2.5469e+06	23.4288	173.793	86.8965	2.07143	4.14286
174.545	33	31	16	3.8418	2.62741	1.31371	5.41903	86.7045	-2.5469e+06	23.6231	174.545	87.2725	2.06251	4.12501
177.049	61	59	30	3.8736	2.74394	1.37197	5.57933	167.38	-2.5469e+06	19.1402	177.049	88.5245	2.03334	4.06667
180	2	1	1	3.8976	2.79135	1.39567	5.58269	5.58269	-2.54691e+06	14.7388	180	90	2	4
182.951	61	2	31	3.8869	2.83769	1.41885	5.58385	173.099	-2.54691e+06	11.1166	182.951	91.4755	1.96774	3.93548
185.455	33	2	17	3.8831	2.87426	1.43713	5.57945	94.8506	-2.54692e+06	8.49697	185.455	92.7275	1.94117	3.88234
187.2	25	2	13	3.8842	2.89821	1.44911	5.57349	72.4553	-2.54692e+06	6.8638	187.2	93.6	1.92308	3.84615
189	40	21	21	3.8846	2.91832	1.45916	5.5587	116.733	-2.54692e+06	5.2564	189	94.5	1.90476	3.80952
192	15	2	8	3.8835	2.94396	1.47198	5.51993	44.1594	-2.54692e+06	2.91079	192	96	1.875	3.75
194.595	37	13	20	3.8791	2.9588	1.4794	5.47377	109.475	-2.54692e+06	1.28862	194.595	97.2975	1.85	3.69999
196.364	11	2	6	3.8745	2.96536	1.48268	5.4365	32.619	-2.54692e+06	0.513278	196.364	98.182	1.83333	3.66666
198	20	11	11	3.8668	2.97012	1.48506	5.40022	59.4024	-2.54692e+06	0.100962	198	99	1.81818	3.63636
199.286	56	47	31	3.8597	2.97279	1.4864	5.3702	166.476	-2.54692e+06	0	199.286	99.643	1.80645	3.6129
200	9	2	5	3.8531	2.97391	1.48696	5.35304	26.7652	-2.54692e+06	0.0267936	200	100	1.8	3.6
202.5	16	9	9	3.836	2.97876	1.48938	5.29557	47.6601	-2.54692e+06	0.776392	202.5	101.25	1.77778	3.55556
205.714	7	2	4	3.8062	2.98464	1.49232	5.22312	20.8925	-2.54692e+06	3.39268	205.714	102.857	1.75	3.5
208.421	19	7	11	3.7759	2.99121	1.4956	5.16663	56.833	-2.54692e+06	7.21023	208.421	104.21	1.72727	3.45455
210	12	7	7	3.7535	2.99578	1.49789	5.13563	35.9494	-2.54691e+06	10.047	210	105	1.71429	3.42857
212.727	22	17	13	3.7063	3.00939	1.50469	5.09281	66.2065	-2.54691e+06	16.2177	212.727	106.364	1.69231	3.38462
216	5	2	3	3.6903	3.55117	1.77558	5.91861	17.7558	-2.5469e+06	20.2732	216	108	1.66667	3.33333

## Sheet: Met_Ile
angle, deg	q	p	r	band_gap, eV	shift, dimer, A	shift_mon, A	h, A	t, A	tot. energy kJ/mol	RelEnergy kJ/Mol	angle_dim, deg	angle_mono, deg	dimers_per_turn	monomers_per_turn
150	12	5	5	4.0665	2.23329	1.11664	5.35989	26.7994	-2.61789e+06	19.1343	150	75	2.4	4.8
152.308	26	19	11	4.0765	2.26735	1.13368	5.35919	58.9511	-2.61789e+06	14.6674	152.308	76.154	2.36363	4.72726
154.286	7	5	3	4.066	2.28885	1.14443	5.34066	16.022	-2.6179e+06	11.0754	154.286	77.143	2.33333	4.66666
156.522	23	7	10	4.0282	2.30436	1.15218	5.30004	53.0004	-2.6179e+06	7.4993	156.522	78.261	2.3	4.59999
158.4	25	16	11	3.9933	2.3112	1.1556	5.25273	57.78	-2.6179e+06	4.96494	158.4	79.2	2.27273	4.54545
161.379	29	9	13	3.9529	2.31727	1.15863	5.16929	67.2007	-2.61791e+06	2.14528	161.379	80.6895	2.23077	4.46155
163.2	75	64	34	3.9292	2.31894	1.15947	5.11532	173.921	-2.61791e+06	1.45354	163.2	81.6	2.20588	4.41176
163.636	11	9	5	3.9249	2.31961	1.15981	5.10315	25.5157	-2.61791e+06	1.51112	163.636	81.8182	2.2	4.4
165	24	11	11	3.9111	2.3216	1.1608	5.06531	55.7184	-2.61791e+06	2.26758	165	82.5	2.18182	4.36364
166.154	13	11	6	3.8967	2.32323	1.16162	5.03367	30.202	-2.61791e+06	3.53699	166.154	83.077	2.16666	4.33333
168	15	13	7	3.8711	2.3332	1.1666	4.99971	34.998	-2.6179e+06	6.87277	168	84	2.14286	4.28571
170.526	19	17	9	3.4252	2.37372	1.18686	5.01119	45.1007	-2.6179e+06	9.60857	170.526	85.263	2.11112	4.22223
172.174	23	21	11	3.362	2.38659	1.1933	4.99015	54.8917	-2.6179e+06	13.5747	172.174	86.087	2.09091	4.18182
173.793	29	27	14	3.3023	2.40489	1.20245	4.98156	69.7418	-2.61789e+06	18.5621	173.793	86.8966	2.07143	4.14286
174.545	33	31	16	3.8751	2.69557	1.34779	5.55962	88.9539	-2.61789e+06	19.9998	174.545	87.2725	2.06251	4.12501
176	45	43	22	3.884	2.73281	1.36641	5.58984	122.976	-2.61789e+06	18.33	176	88	2.04545	4.09091
177.049	61	59	30	3.8838	2.75423	1.37712	5.60027	168.008	-2.61789e+06	16.9708	177.049	88.5245	2.03334	4.06667
180	2	1	1	3.8902	2.80313	1.40156	5.60626	5.60626	-2.6179e+06	13.333	180	90	2	4
182.951	61	2	31	3.8748	2.84912	1.42456	5.60633	173.796	-2.6179e+06	10.2992	182.951	91.4755	1.96774	3.93548
185.455	33	2	17	3.8869	2.8848	1.4424	5.5999	95.1983	-2.6179e+06	8.14841	185.455	92.7275	1.94117	3.88234
187.2	25	2	13	3.9502	2.90617	1.45308	5.58879	72.6542	-2.6179e+06	6.49984	187.2	93.6	1.92308	3.84615
189	40	21	21	3.9757	2.92035	1.46017	5.56256	116.814	-2.6179e+06	4.72743	189	94.5	1.90476	3.80952
192	15	2	8	3.9867	2.93939	1.4697	5.51136	44.0909	-2.61791e+06	2.20937	192	96	1.875	3.75
194.595	37	13	20	3.988	2.95352	1.47676	5.464	109.28	-2.61791e+06	0.809948	194.595	97.2975	1.85	3.69999
196.364	11	2	6	3.9814	2.9613	1.48065	5.42905	32.5743	-2.61791e+06	0.209618	196.364	98.182	1.83333	3.66666
198	20	11	11	3.9749	2.96734	1.48367	5.39516	59.3467	-2.61791e+06	0	198	99	1.81818	3.63636
199.286	56	47	31	3.965	2.97251	1.48625	5.36969	166.46	-2.61791e+06	0.0843111	199.286	99.643	1.80645	3.6129
200	9	2	5	3.9581	2.97496	1.48748	5.35492	26.7746	-2.61791e+06	0.188029	200	100	1.8	3.6
202.5	16	9	9	3.9264	2.98338	1.49169	5.30379	47.7341	-2.61791e+06	1.08124	202.5	101.25	1.77778	3.55556
205.714	7	2	4	3.8864	2.99922	1.49961	5.24863	20.9945	-2.61791e+06	2.24278	205.714	102.857	1.75	3.5
208.421	19	7	11	3.8572	3.00069	1.50035	5.18301	57.0131	-2.6179e+06	4.8129	208.421	104.21	1.72727	3.45455
210	12	7	7	3.8333	3.00182	1.50091	5.14597	36.0218	-2.6179e+06	6.94743	210	105	1.71429	3.42857
212.727	22	17	13	3.7828	3.00661	1.50331	5.08811	66.1454	-2.6179e+06	11.8976	212.727	106.364	1.69231	3.38462
216	5	2	3	3.7011	3.05155	1.52578	5.08592	15.2578	-2.61789e+06	19.6885	216	108	1.66667	3.33333

## Sheet: Met_Val
angle, deg	q	p	r	band_gap, eV	shift, dimer, A	shift_mon, A	h, A	t, A	tot. energy kJ/mol	RelEnergy kJ/Mol	angle_dim, deg	angle_mono, deg	dimers_per_turn	monomers_per_turn
150	12	5	5	4.0582	2.23148	1.11574	5.35556	26.7778	-2.75289e+06	20.02	150	75	2.4	4.8
152.308	26	19	11	4.0664	2.26645	1.13323	5.35708	58.9278	-2.7529e+06	14.9493	152.308	76.154	2.36363	4.72726
154.286	7	5	3	4.051	2.28932	1.14466	5.34175	16.0252	-2.7529e+06	10.8314	154.286	77.143	2.33333	4.66666
156.522	23	7	10	4.0142	2.30448	1.15224	5.30031	53.0031	-2.75291e+06	6.85209	156.522	78.261	2.3	4.59999
158.4	25	16	11	3.9817	2.31116	1.15558	5.25265	57.7791	-2.75291e+06	4.1014	158.4	79.2	2.27273	4.54545
161.379	29	9	13	3.938	2.31697	1.15848	5.16862	67.1921	-2.75291e+06	1.31727	161.379	80.6895	2.23077	4.46155
162.74	73	31	33	3.9186	2.31856	1.15928	5.12893	169.255	-2.75291e+06	0.84918	162.74	81.37	2.21212	4.42423
163.636	11	9	5	3.9075	2.31986	1.15993	5.1037	25.5185	-2.75291e+06	1.05695	163.636	81.8182	2.2	4.4
164.571	35	11	16	3.8981	2.32137	1.16068	5.07799	81.2479	-2.75291e+06	1.67542	164.571	82.2855	2.18751	4.37501
165	24	11	11	3.8931	2.32182	1.16091	5.06579	55.7236	-2.75291e+06	2.11027	165	82.5	2.18182	4.36364
166.154	13	11	6	3.8776	2.32411	1.16205	5.03556	30.2134	-2.75291e+06	3.60929	166.154	83.0769	2.16667	4.33333
168	15	13	7	3.8529	2.33204	1.16602	4.99722	34.9805	-2.75291e+06	7.38947	168	84	2.14286	4.28571
170.526	19	17	9	3.4339	2.37038	1.18519	5.00414	45.0373	-2.7529e+06	12.5014	170.526	85.263	2.11112	4.22223
172.174	23	21	11	3.3545	2.38125	1.19063	4.97898	54.7688	-2.7529e+06	16.8278	172.174	86.087	2.09091	4.18182
173.793	29	27	14	3.7892	2.59658	1.29829	5.37864	75.3009	-2.75289e+06	22.3855	173.793	86.8965	2.07143	4.14286
174.545	33	31	16	3.8076	2.63987	1.31993	5.44473	87.1157	-2.75289e+06	22.7386	174.545	87.2725	2.06251	4.12501
177.049	61	59	30	3.8483	2.75269	1.37634	5.59713	167.914	-2.7529e+06	18.0449	177.049	88.5245	2.03334	4.06667
180	2	1	1	3.8716	2.80113	1.40056	5.60225	5.60225	-2.7529e+06	13.5996	180	90	2	4
182.951	61	2	31	3.8621	2.84692	1.42346	5.60201	173.662	-2.7529e+06	9.93409	182.951	91.4755	1.96774	3.93548
185.455	33	2	17	3.8665	2.88364	1.44182	5.59766	95.1603	-2.75291e+06	7.42137	185.455	92.7275	1.94117	3.88234
187.2	25	2	13	3.8747	2.90625	1.45313	5.58895	72.6563	-2.75291e+06	5.91716	187.2	93.6	1.92308	3.84615
189	40	21	21	3.8832	2.92567	1.46283	5.5727	117.027	-2.75291e+06	4.48166	189	94.5	1.90476	3.80952
192	15	2	8	3.8984	2.95238	1.47619	5.53571	44.2857	-2.75291e+06	2.42697	192	96	1.875	3.75
194.595	37	13	20	3.8999	2.96726	1.48363	5.48943	109.789	-2.75291e+06	1.08429	194.595	97.2975	1.85	3.69999
196.364	11	2	6	3.8974	2.97614	1.48807	5.45626	32.7376	-2.75291e+06	0.410943	196.364	98.182	1.83333	3.66666
198	20	11	11	3.8944	2.98257	1.49129	5.42286	59.6514	-2.75291e+06	0.0798335	198	99	1.81818	3.63636
199.286	56	47	31	3.8871	2.98704	1.49352	5.39594	167.274	-2.75291e+06	0	199.286	99.643	1.80645	3.6129
200	9	2	5	3.881	2.98894	1.49447	5.3801	26.9005	-2.75291e+06	0.0336142	200	100	1.8	3.6
202.5	16	9	9	3.8616	2.9939	1.49695	5.32248	47.9024	-2.75291e+06	0.640166	202.5	101.25	1.77778	3.55556
205.714	7	2	4	3.8371	2.9965	1.49825	5.24388	20.9755	-2.75291e+06	2.72641	205.714	102.857	1.75	3.5
208.421	19	7	11	3.8046	3.00084	1.50042	5.18328	57.016	-2.75291e+06	5.70265	208.421	104.21	1.72727	3.45455
210	12	7	7	3.7792	3.0037	1.50185	5.1492	36.0444	-2.75291e+06	8.0544	210	105	1.71429	3.42857
212.727	22	17	13	3.7371	3.01221	1.50611	5.09759	66.2687	-2.7529e+06	13.4292	212.727	106.364	1.69231	3.38462
216	5	2	3	3.6661	3.08717	1.54358	5.14528	15.4358	-2.75289e+06	21.6025	216	108	1.66667	3.33333
