# Supplementary material for: Computational design of helical artificial metallopeptides: from sequence to activity in Pd-peptide systems
Source: Royal Society of Chemistry journal article supplement (doi:10.1039/d5qi01794g), 2025-10-17
Supplement: d5qi01794g2.zip [file 0data.xlsx]

## Sheet: MetAla
	angle, deg	q	p	r	band_gap, eV	shift, Nmer, A	shift, mono, A	h, A	h mono, A	t, A	tot. energy kJ/mol	RelEnergy kJ/Mol	angle_eight, deg	angle_mono, deg	angle_dim, deg	eightmers_per_turn	dimers_per_turn	monomers_per_turn
21_16_alpha_pd.out	68.571	21	16	4	2.2872	11.8888	1.4861	62.4161	5.42749	249.664	-1.08571e+07	16.3754	68.571	98.5714	197.143	5.25003	1.82609	3.65218
5_1_4am_alpha.out	72	5	1	1	2.2755	11.8943	1.48678	59.4714	5.40649	59.4714	-1.08571e+07	15.874	72	99	198	5	1.81818	3.63636
29_5_alpha_pd.out	74.483	29	5	6	2.272	11.9005	1.48757	57.5192	5.39242	345.115	-1.08571e+07	15.6887	74.483	99.3104	198.621	4.83332	1.8125	3.625
24_5_4am_alpha.out	75	24	5	5	2.2705	11.9011	1.48763	57.1251	5.38916	285.625	-1.08571e+07	15.6917	75	99.375	198.75	4.8	1.81132	3.62264
19_5_alpha_pd.out	75.789	19	5	4	2.2701	11.9024	1.4878	56.5365	5.38443	226.146	-1.08571e+07	15.7233	75.789	99.4736	198.947	4.75003	1.80952	3.61905
23_14_4am_alpha.out	78.261	23	14	5	2.2666	11.9057	1.48821	54.7661	5.36922	273.83	-1.08571e+07	15.9333	78.261	99.7826	199.565	4.59999	1.80392	3.60784
9_5_pd_4am_alpha.out	80	9	5	2	2.2807	11.9151	1.48939	53.618	5.3618	107.236	-1.08571e+07	16.251	80	100	200	4.5	1.8	3.6
22_9_4am_alpha.out	81.818	22	9	5	2.2627	11.9128	1.4891	52.4162	5.34859	262.081	-1.08571e+07	16.8405	81.818	100.227	200.454	4.40001	1.79592	3.59184
4_3_4am_Pd.out	270	4	3	3	2.305	9.20212	1.15027	12.2695	5.25836	36.8085	-1.08571e+07	7.07545	270	78.75	157.5	1.33333	2.28571	4.57143
13_4_4am_pd.out	276.923	13	4	10	2.2663	9.22066	1.15258	11.9869	5.21168	119.869	-1.08571e+07	1.10579	276.923	79.6154	159.231	1.3	2.26087	4.52174
9_4_4am_pd.out	280	9	4	7	2.2504	9.22401	1.153	11.8594	5.1885	83.0161	-1.08571e+07	0.119462	280	80	160	1.28571	2.25	4.5
23_9_4am_pd.out	281.739	23	9	18	2.244	9.22837	1.15355	11.7918	5.17689	212.253	-1.08571e+07	0	281.739	80.2174	160.435	1.27778	2.2439	4.48781
14_9_4am_pd.out	282.857	14	9	11	2.2402	9.23125	1.15391	11.7489	5.1695	129.237	-1.08571e+07	0.0550927	282.857	80.3571	160.714	1.27273	2.24	4.48
19_14_4am_Pd.out	284.21	19	14	15	2.2361	9.23357	1.1542	11.6959	5.15994	175.438	-1.08571e+07	0.465792	284.21	80.5263	161.053	1.26667	2.2353	4.47059
29_24_4am_Pd.out	285.517	29	24	23	2.2317	9.23618	1.15452	11.6456	5.15095	267.849	-1.08571e+07	1.07951	285.517	80.6896	161.379	1.26087	2.23077	4.46154
5_4_4am_Pd.out	288	5	4	4	2.2253	9.24177	1.15522	11.5522	5.13432	46.2089	-1.08571e+07	2.83361	288	81	162	1.25	2.22222	4.44444

## Sheet: MetIle
angle, deg	q	p	r	band_gap, eV	shift, Nmer, A	shift, mono, A	h, A	h mono, A	t, A	tot. energy kJ/mol	RelEnergy kJ/Mol	angle_eight, deg	angle_mono, deg	angle_dim, deg	eightmers_per_turn	dimers_per_turn	monomers_per_turn
69.231	26	21	5	2.3364	11.9385	1.49231	62.08	5.44562	310.4	-1.10991e+07	7.3672	69.231	98.6539	197.308	5.19998	1.82456	3.64912
72	5	1	1	2.3342	11.9492	1.49365	59.7461	5.43146	59.7461	-1.10991e+07	6.97475	72	99	198	5	1.81818	3.63636
74.483	29	5	6	2.33	11.9581	1.49477	57.7977	5.41853	346.786	-1.10991e+07	6.92316	74.483	99.3104	198.621	4.83332	1.8125	3.625
75.789	19	5	4	2.3277	11.961	1.49513	56.8149	5.41095	227.26	-1.10991e+07	6.94916	75.789	99.4736	198.947	4.75003	1.80952	3.61905
78.261	23	14	5	2.3246	11.9699	1.49623	55.0614	5.39818	275.307	-1.10991e+07	7.29075	78.261	99.7826	199.565	4.59999	1.80392	3.60784
270	4	3	3	2.443	9.21243	1.15155	12.2832	5.26424	36.8497	-1.10991e+07	1.60114	270	78.75	157.5	1.33333	2.28571	4.57143
272.727	33	4	25	2.4221	9.23481	1.15435	12.1899	5.25429	304.749	-1.10991e+07	0.498578	272.727	79.0909	158.182	1.32	2.27586	4.55173
276.923	13	4	10	2.3843	9.25649	1.15706	12.0334	5.23193	120.334	-1.10991e+07	0	276.923	79.6154	159.231	1.3	2.26087	4.52174
280	9	4	7	2.3578	9.26959	1.1587	11.9181	5.21415	83.4264	-1.10991e+07	0.67829	280	80	160	1.28571	2.25	4.5
282.857	14	9	11	2.3378	9.28011	1.16001	11.811	5.19686	129.921	-1.10991e+07	1.9432	282.857	80.3571	160.714	1.27273	2.24	4.48
284.211	19	14	15	2.3281	9.28169	1.16021	11.7568	5.18682	176.352	-1.10991e+07	2.71723	284.211	80.5264	161.053	1.26666	2.23529	4.47058
288	5	4	4	2.3023	9.29331	1.16166	11.6166	5.16295	46.4665	-1.10991e+07	6.04829	288	81	162	1.25	2.22222	4.44444
292.5	16	5	13	2.2742	9.30323	1.1629	11.4501	5.13282	148.852	-1.10991e+07	11.1519	292.5	81.5625	163.125	1.23077	2.2069	4.41379
294.545	11	5	9	2.2624	9.30777	1.16347	11.3762	5.11928	102.385	-1.10991e+07	14.2301	294.545	81.8181	163.636	1.22222	2.2	4.4
296.471	17	11	14	2.25	9.31098	1.16387	11.3062	5.10602	158.287	-1.10991e+07	17.465	296.471	82.0589	164.118	1.21428	2.19355	4.38709
297.391	23	17	19	2.244	9.31311	1.16414	11.2738	5.10004	214.201	-1.10991e+07	19.143	297.391	82.1739	164.348	1.21053	2.19048	4.38095

## Sheet: MetVal
angle, deg	q	p	r	band_gap, eV	shift, Nmer, A	shift, mono, A	h, A	h mono, A	t, A	tot. energy kJ/mol	RelEnergy kJ/Mol	angle_eight, deg	angle_mono, deg	angle_dim, deg	eightmers_per_turn	dimers_per_turn	monomers_per_turn
67.5	16	11	3	2.0608	11.9551	1.49439	63.7606	5.46519	191.282	-1.16811e+07	35.8308	67.5	98.4375	196.875	5.33333	1.82857	3.65714
72	5	1	1	2.0514	11.9719	1.49649	59.8595	5.44178	59.8595	-1.16811e+07	34.5254	72	99	198	5	1.81818	3.63636
75.789	19	5	4	2.0424	11.9828	1.49785	56.9184	5.4208	227.673	-1.16811e+07	34.122	75.789	99.4736	198.947	4.75003	1.80952	3.61905
77.143	14	5	3	2.0385	11.9863	1.49828	55.9359	5.41315	167.808	-1.16811e+07	34.0657	77.143	99.6429	199.286	4.66666	1.80645	3.6129
78.261	23	14	5	2.0365	11.989	1.49863	55.1496	5.40682	275.748	-1.16811e+07	34.1241	78.261	99.7826	199.565	4.59999	1.80392	3.60784
80	9	5	2	2.0316	11.9911	1.49888	53.9597	5.39597	107.919	-1.16811e+07	34.3558	80	100	200	4.5	1.8	3.6
83.077	13	9	3	2.0245	11.9959	1.49949	51.9824	5.37749	155.947	-1.16811e+07	35.0782	83.077	100.385	200.769	4.33333	1.7931	3.58621
274.286	21	4	16	2.3288	9.26245	1.15781	12.157	5.25706	194.511	-1.16811e+07	0.958815	274.286	79.2857	158.571	1.3125	2.27027	4.54054
275.294	17	4	13	2.3222	9.26738	1.15842	12.1189	5.25152	157.546	-1.16811e+07	0.62556	275.294	79.4117	158.823	1.30769	2.26667	4.53333
276.923	13	4	10	2.3108	9.27353	1.15919	12.0556	5.24156	120.556	-1.16811e+07	0.243115	276.923	79.6154	159.231	1.3	2.26087	4.52174
280	9	4	7	2.292	9.28427	1.16053	11.9369	5.2224	83.5584	-1.16811e+07	0	280	80	160	1.28571	2.25	4.5
285.517	29	24	23	2.2662	9.2971	1.16214	11.7224	5.18493	269.616	-1.16811e+07	1.51557	285.517	80.6896	161.379	1.26087	2.23077	4.46154
288	5	4	4	2.2573	9.30145	1.16268	11.6268	5.16747	46.5072	-1.16811e+07	3.24243	288	81	162	1.25	2.22222	4.44444
