# Supplementary material for: Computational design of helical artificial metallopeptides: from sequence to activity in Pd-peptide systems
Source: Royal Society of Chemistry journal article supplement (doi:10.1039/d5qi01794g), 2025-10-17
Supplement: d5qi01794g2.zip [file 0data.xlsx]

## Sheet: 4_utit_Pi_helix_OA
Compounds	G(PBE/def2-SVP/TZVP)	E(PBE/def2-SVP/TZVP)	E(wB97X-V/def2-TZVP)	G (gas)	E(B3LYP/6-31*G, vac)	E(B3LYP/6-31*G, THF)	E(B3LYP/6-31*G, H2O)	gCP	G(THF)	G(H2O)	Imaginary Freq., cm-1	FES(THF) [kJ/mol]	FES(H2O) [kJ/mol]
PhBr	-2804.59	-2804.65	-2805.58	-2805.52	-244.626	-244.636	-244.627	0.0069	-2805.52	-2805.51
[Pd(Met)2]@pi-peptide	-16689.2	-16688	-16701.7	-16703	-5905.46	-5905.67	-5905.64	0.2001	-16703	-16702.9
1	-19493.8	-19492.7	-19507.3	-19508.5	-6150.08	-6150.3	-6150.27	0.207	-19508.5	-19508.5		0	0
1'	-19493.8	-19492.7	-19507.3	-19508.5	-6150.08	-6150.29	-6150.27	0.2096	-19508.5	-19508.5		5.20167	-0.0493304	0.00301879	is ∆G = 298.15*R*ln(24.465)
TS1	-19493.8	-19492.7	-19507.3	-19508.5	-6150.05	-6150.27	-6150.24	0.2104	-19508.5	-19508.4	-106.15	73.7272	64.538
2	-19493.9	-19492.7	-19507.4	-19508.5	-6150.12	-6150.33	-6150.31	0.2092	-19508.5	-19508.5		-111.371	-118.722
