# Supplementary material for: Computational design of helical artificial metallopeptides: from sequence to activity in Pd-peptide systems
Source: Royal Society of Chemistry journal article supplement (doi:10.1039/d5qi01794g), 2025-10-17
Supplement: d5qi01794g2.zip [file 0data_intermediates.xlsx]

## Sheet: Br
angle, deg	q	p	r	band_gap, eV	shift, Nmer, A	shift, mono, A	h, A	h mono, A	t, A	tot. energy kJ/mol	RelEnergy kJ/Mol	angle_eight, deg	angle_mono, deg	angle_dim, deg	eightmers_per_turn	dimers_per_turn	monomers_per_turn
281.739	23	9	18	2.9016	9.25881	1.15735	11.8307	5.19397	212.953	-2.55844e+07	0.932721	281.739	80.2174	160.435	1.27778	2.2439	4.4878
282.857	14	9	11	2.9037	9.26406	1.15801	11.7906	5.18787	129.697	-2.55844e+07	0.462318	282.857	80.3571	160.714	1.27273	2.24	4.48
284.211	19	14	15	2.9052	9.26842	1.15855	11.74	5.17941	176.1	-2.55844e+07	0.10072	284.211	80.5264	161.053	1.26666	2.23529	4.47058
285	24	19	19	2.9013	9.26871	1.15859	11.7078	5.17323	222.449	-2.55844e+07	0.0302432	285	80.625	161.25	1.26316	2.23256	4.46512
285.517	29	24	23	2.9019	9.26868	1.15859	11.6866	5.16907	268.792	-2.55844e+07	0	285.517	80.6896	161.379	1.26087	2.23077	4.46154
286.531	49	44	39	2.9024	9.27305	1.15913	11.6508	5.1634	454.38	-2.55844e+07	0.0592353	286.531	80.8164	161.633	1.25641	2.22727	4.45454
288	5	4	4	2.9015	9.27612	1.15951	11.5951	5.1534	46.3806	-2.55844e+07	0.338131	288	81	162	1.25	2.22222	4.44444
60	6	1	1	2.6933	11.6806	1.46008	70.0838	5.39106	70.0838	-2.55843e+07	70.6529	60	97.5	195	6	1.84615	3.69231
72	5	1	1	2.7637	11.7989	1.47486	58.9943	5.36312	58.9943	-2.55843e+07	57.5001	72	99	198	5	1.81818	3.63636
77.143	14	5	3	2.7729	11.8252	1.47815	55.1844	5.34043	165.553	-2.55843e+07	55.6319	77.143	99.6429	199.286	4.66666	1.80645	3.6129
80	9	5	2	2.781	11.8383	1.47979	53.2725	5.32725	106.545	-2.55843e+07	55.223	80	100	200	4.5	1.8	3.6
83.077	13	9	3	2.7894	11.8549	1.48186	51.3713	5.31427	154.114	-2.55843e+07	55.187	83.077	100.385	200.769	4.33333	1.7931	3.58621
85.714	21	17	5	2.7907	11.8658	1.48323	49.8365	5.30175	249.182	-2.55843e+07	55.3148	85.714	100.714	201.428	4.20001	1.78723	3.57447
86.897	29	25	7	2.7907	11.8696	1.4837	49.1739	5.29565	344.218	-2.55843e+07	55.6045	86.897	100.862	201.724	4.14284	1.78461	3.56923
90	4	1	1	2.7886	11.89	1.48625	47.5599	5.28443	47.5599	-2.55843e+07	56.4023	90	101.25	202.5	4	1.77778	3.55556
93.913	23	4	6	2.7945	11.9024	1.4878	45.626	5.26453	273.756	-2.55843e+07	58.1871	93.913	101.739	203.478	3.83334	1.76923	3.53846

## Sheet: OH
angle, deg	q	p	r	band_gap, eV	shift, Nmer, A	shift, mono, A	h, A	h mono, A	t, A	tot. energy kJ/mol	RelEnergy kJ/Mol	angle_eight, deg	angle_mono, deg	angle_dim, deg	eightmers_per_turn	dimers_per_turn	monomers_per_turn
280	9	4	7	2.9534	9.25311	1.15664	11.8969	5.20487	83.278	-1.24683e+07	0.726037	280	80	160	1.28571	2.25	4.5
281.739	23	9	18	2.9482	9.25278	1.1566	11.823	5.19058	212.814	-1.24683e+07	0.151467	281.739	80.2174	160.435	1.27778	2.2439	4.4878
282.857	14	9	11	2.9448	9.25319	1.15665	11.7768	5.18179	129.545	-1.24683e+07	0	282.857	80.3571	160.714	1.27273	2.24	4.48
284.211	19	14	15	2.9401	9.25462	1.15683	11.7225	5.17169	175.838	-1.24683e+07	0.024108	284.211	80.5264	161.053	1.26666	2.23529	4.47058
285	24	19	19	2.9369	9.25489	1.15686	11.6904	5.16552	222.117	-1.24683e+07	0.153304	285	80.625	161.25	1.26316	2.23256	4.46512
60	6	1	1	2.3898	11.7839	1.47298	70.7032	5.4387	70.7032	-1.24683e+07	69.3111	60	97.5	195	6	1.84615	3.69231
63.529	17	6	3	2.4038	11.8111	1.47639	66.9297	5.42673	200.789	-1.24683e+07	68.4007	63.529	97.9411	195.882	5.6667	1.83784	3.67568
65.455	11	6	2	2.4093	11.8183	1.47729	65.0007	5.41672	130.001	-1.24683e+07	68.094	65.455	98.1819	196.364	5.49996	1.83333	3.66666
68.571	21	16	4	2.4234	11.833	1.47912	62.1231	5.40202	248.493	-1.24683e+07	67.8141	68.571	98.5714	197.143	5.25003	1.82609	3.65218
72	5	1	1	2.4267	11.8454	1.48068	59.2272	5.38429	59.2272	-1.24683e+07	68.0185	72	99	198	5	1.81818	3.63636
75	24	5	5	2.4374	11.8557	1.48196	56.9072	5.3686	284.536	-1.24683e+07	68.5142	75	99.375	198.75	4.8	1.81132	3.62264
77.143	14	5	3	2.4445	11.8626	1.48282	55.3587	5.35729	166.076	-1.24683e+07	69.0896	77.143	99.6429	199.286	4.66666	1.80645	3.6129

## Sheet: Vin
angle, deg	q	p	r	band_gap, eV	shift, Nmer, A	shift, mono, A	h, A	h mono, A	t, A	tot. energy kJ/mol	RelEnergy kJ/Mol	angle_eight, deg	angle_mono, deg	angle_dim, deg	eightmers_per_turn	dimers_per_turn	monomers_per_turn
65.455	11	6	2	3.0479	11.8528	1.4816	65.1906	5.43255	130.381	-1.24794e+07	34.7573	65.455	98.1819	196.364	5.49996	1.83333	3.66666
67.5	16	11	3	3.0463	11.8621	1.48276	63.2643	5.42266	189.793	-1.24794e+07	34.0737	67.5	98.4375	196.875	5.33333	1.82857	3.65714
69.231	26	21	5	3.0457	11.8717	1.48396	61.7326	5.41514	308.663	-1.24794e+07	33.6818	69.231	98.6539	197.308	5.19998	1.82456	3.64912
72	5	1	1	3.0434	11.8824	1.4853	59.4121	5.4011	59.4121	-1.24794e+07	33.1517	72	99	198	5	1.81818	3.63636
75	24	5	5	3.0427	11.8954	1.48693	57.098	5.3866	285.49	-1.24794e+07	33.062	75	99.375	198.75	4.8	1.81132	3.62264
75.789	19	5	4	3.0426	11.8984	1.4873	56.5175	5.38262	226.07	-1.24794e+07	33.1083	75.789	99.4736	198.947	4.75003	1.80952	3.61905
78.261	23	14	5	3.0426	11.9093	1.48866	54.7828	5.37086	273.914	-1.24794e+07	33.5352	78.261	99.7826	199.565	4.59999	1.80392	3.60784
80	9	5	2	3.0398	11.9143	1.48928	53.6142	5.36142	107.228	-1.24794e+07	33.9363	80	100	200	4.5	1.8	3.6
280	9	4	7	2.9173	9.26969	1.15871	11.9182	5.2142	83.4272	-1.24794e+07	1.9799	280	80	160	1.28571	2.25	4.5
284.211	19	14	15	2.9211	9.27608	1.15951	11.7497	5.18369	176.246	-1.24794e+07	0.0631202	284.211	80.5264	161.053	1.26666	2.23529	4.47058
285	24	19	19	2.9214	9.27816	1.15977	11.7198	5.17851	222.676	-1.24794e+07	0	285	80.625	161.25	1.26316	2.23256	4.46512
286.364	44	39	35	2.9243	9.27991	1.15999	11.6662	5.16856	408.316	-1.24794e+07	0.0310277	286.364	80.7955	161.591	1.25714	2.22785	4.45569
288	5	4	4	2.9265	9.28267	1.16033	11.6033	5.15704	46.4133	-1.24794e+07	0.39551	288	81	162	1.25	2.22222	4.44444
292.5	16	5	13	2.9355	9.29046	1.16131	11.4344	5.12577	148.647	-1.24794e+07	3.28204	292.5	81.5625	163.125	1.23077	2.2069	4.41379

## Sheet: Ph
angle, deg	q	p	r	band_gap, eV	shift, Nmer, A	shift, mono, A	h, A	h mono, A	t, A	tot. energy kJ/mol	RelEnergy kJ/Mol	angle_eight, deg	angle_mono, deg	angle_dim, deg	eightmers_per_turn	dimers_per_turn	monomers_per_turn
282.857	14	9	11	2.9568	9.26105	1.15763	11.7868	5.18619	129.655	-1.32846e+07	0.408305	282.857	80.3571	160.714	1.27273	2.24	4.48
284.211	19	14	15	2.9585	9.26166	1.15771	11.7314	5.17563	175.972	-1.32846e+07	0.0970914	284.211	80.5264	161.053	1.26666	2.23529	4.47058
285	24	19	19	2.9604	9.26264	1.15783	11.7002	5.16984	222.303	-1.32846e+07	0.00268551	285	80.625	161.25	1.26316	2.23256	4.46512
285.517	29	24	23	2.9622	9.26384	1.15798	11.6805	5.16638	268.652	-1.32846e+07	0	285.517	80.6896	161.379	1.26087	2.23077	4.46154
286.154	39	34	31	2.9648	9.26449	1.15806	11.6553	5.16164	361.315	-1.32846e+07	0.00516703	286.154	80.7692	161.538	1.25806	2.22857	4.45714
288	5	4	4	2.9719	9.26866	1.15858	11.5858	5.14925	46.3433	-1.32846e+07	0.417668	288	81	162	1.25	2.22222	4.44444
60	6	1	1	2.9815	11.8423	1.48029	71.054	5.46569	71.054	-1.32845e+07	90.5058	60	97.5	195	6	1.84615	3.69231
65.455	11	6	2	2.9699	11.8552	1.48191	65.2039	5.43365	130.408	-1.32845e+07	88.745	65.455	98.1819	196.364	5.49996	1.83333	3.66666
67.5	16	11	3	2.9645	11.8595	1.48244	63.2507	5.42149	189.752	-1.32845e+07	88.5156	67.5	98.4375	196.875	5.33333	1.82857	3.65714
72	5	1	1	2.9552	11.8693	1.48366	59.3466	5.39514	59.3466	-1.32845e+07	88.5996	72	99	198	5	1.81818	3.63636
80	9	5	2	2.93	11.8788	1.48485	53.4548	5.34548	106.91	-1.32845e+07	91.9514	80	100	200	4.5	1.8	3.6
