# Supplementary material for: Computational design of helical artificial metallopeptides: from sequence to activity in Pd-peptide systems
Source: Royal Society of Chemistry journal article supplement (doi:10.1039/d5qi01794g), 2025-10-17
Supplement: d5qi01794g2.zip [file basis set_compare.xlsx]

## Sheet: HQ
Alpha																Pi minima	Alpha minima
PBE0 D3 TZVP															Rel. Energy kJ/mol	1.86171	-0.011636			EXP REF	Q	h	f	d(O-N)	R(C_alpha)
deg	Qaa	q	p	T	f	h	d(O-N)	d(C_alpha-H)	d(H-N)	R(C_alpha)	Ang(C-O-N)	Ang(phi)	Ang(psi)	Energy, kJ/mol	Angle, deg	80.7008	99.7782				3.615	5.41	1.495	2.824	2.29
104.211	3.45453	38	7	56.1037	1.47641	5.10034	2.85282	1.0923	1.01668	2.21815	151.736	-62.869	-37.18	3.67816	Qaa	4.46092	3.608			angle	99.5851		1.5	2.909
102.857	3.5	7	4	10.3161	1.47373	5.15806	2.83485	1.09227	1.0179	2.23789	152.898	-62.331	-39.199	1.76307										2.87
100	3.6	18	11	26.434	1.46855	5.28679	2.82358	1.09214	1.01906	2.28128	154.192	-61.874	-42.696	0
99.574	3.6154	47	29	68.9762	1.46758	5.30586	2.82438	1.09211	1.01913	2.28764	154.203	-61.947	-43.07	0.000691217						mean	3.615	5.41	1.4975	2.86767	2.29
98.182	3.66666	11	4	16.0953	1.46321	5.3651	2.82949	1.09201	1.01921	2.31133	153.87	-62.429	-44.057	0.324474
96	3.75	15	4	21.7935	1.4529	5.44838	2.84315	1.09179	1.01902	2.35114	152.601	-63.393	-45.368	1.6372
Alpha																Pi minima	Alpha minima
PBE0 TZVP															Rel. Energy kJ/mol	2.29467	-0.184846
deg	Qaa	q	p	T	f	h	d(O-N)	d(C_alpha-H)	d(H-N)	R(C_alpha)	Ang(C-O-N)	Ang(phi)	Ang(psi)	Energy, kJ/mol	Angle, deg	80.3899	98.6021
104.211	3.45453	38	7	57.0627	1.50165	5.18752	2.93811	1.09236	1.01523	2.21836	151.815	-62.762	-36.867	4.20476	Qaa	4.47818	3.65104
102.857	3.5	7	4	10.4605	1.49435	5.23024	2.90376	1.09235	1.01674	2.23874	153.036	-62.311	-38.867	2.19993
100	3.6	18	11	26.7387	1.48548	5.34774	2.88136	1.09219	1.01812	2.28401	154.181	-62.287	-42.011	0
99.574	3.6154	47	29	69.7614	1.48429	5.36626	2.88182	1.09216	1.01821	2.29049	154.152	-62.425	-42.33	-0.119094
98.182	3.66666	11	4	16.2716	1.47924	5.42386	2.88593	1.09205	1.01834	2.31383	153.693	-63.094	-43.158	-0.168538
96	3.75	15	4	22.0328	1.46885	5.50819	2.9012	1.09182	1.01814	2.3547	152.293	-64.181	-44.381	0.585392
Alpha																Pi minima	Alpha minima
PBE TZVP															Rel. Energy kJ/mol	1.43353	-0.104555
deg	Qaa	q	p	T	f	h	d(O-N)	d(C_alpha-H)	d(H-N)	R(C_alpha)	Ang(C-O-N)	Ang(phi)	Ang(psi)	Energy, kJ/mol	Angle, deg	80.5825	99.1202
104.211	3.45453	38	7	57.1028	1.50271	5.19116	2.92526	1.10024	1.02668	2.24072	151.266	-62.749	-37.113	3.92447	Qaa	4.46747	3.63195
102.857	3.5	7	4	10.4818	1.4974	5.2409	2.89757	1.10023	1.02816	2.26214	152.488	-62.209	-39.16	2.00593
100	3.6	18	11	26.8352	1.49085	5.36705	2.8827	1.10007	1.02931	2.30628	153.684	-62.109	-42.32	0
99.574	3.6154	47	29	70.0141	1.48966	5.3857	2.88339	1.10003	1.02937	2.31282	153.646	-62.261	-42.623	-0.0912287
98.182	3.66666	11	4	16.3325	1.48477	5.44416	2.88865	1.09991	1.0294	2.33701	153.17	-62.968	-43.401	-0.0454276
96	3.75	15	4	22.1145	1.4743	5.52862	2.90423	1.09966	1.02909	2.37768	151.822	-64.02	-44.635	0.784857
PBE DZVP_r2 TZVP (Our basis set)																Pi minima	Alpha minima
deg	Qaa	q	p	T	f	h	d(O-N)	d(C_alpha-H)	d(H-N)	R(C_alpha)	Ang(C-O-N)	Ang(phi)	Ang(psi)	Energy, kJ/mol	Rel. Energy kJ/mol	2.16893	-0.003307
104.211	3.45453	38	7	56.9721	1.49927	5.17928	2.89429	1.10362	1.02785	2.23523	152.001	-61.829	-37.967	3.10957	Angle, deg	80.7699	99.887
102.857	3.5	7	4	10.4694	1.49563	5.23471	2.87216	1.10363	1.02922	2.25527	153.244	-61.208	-40.077	1.37009	Qaa	4.45711	3.60407
100	3.6	18	11	26.837	1.49094	5.3674	2.85856	1.10355	1.03049	2.29847	154.955	-60.347	-43.959	0
99.574	3.6154	47	29	70.0295	1.48999	5.38688	2.85852	1.10353	1.03059	2.30467	155.07	-60.345	-44.406	0.0191097
98.182	3.66666	11	4	16.3474	1.48612	5.44912	2.8622	1.10347	1.03072	2.32788	155.084	-60.569	-45.642	0.468658
96	3.75	15	4	22.1395	1.47597	5.53487	2.87225	1.10331	1.03057	2.36736	154.256	-61.309	-47.19	2.02347
