# Supplementary material for: Computational design of helical artificial metallopeptides: from sequence to activity in Pd-peptide systems
Source: Royal Society of Chemistry journal article supplement (doi:10.1039/d5qi01794g), 2025-10-17
Supplement: d5qi01794g2.zip [file Phospine_data-kJ.xlsx]

## Sheet: Helices_to_ORCA
Index	Compounds	G(B97-3c), gas	E(B97-3c), gas	E(wB97X-V), gas	E(wB97X-V//B97-3c), gas	E(B3LYP), gas	E(B3LYP), SMD(THF)	E(B3LYP), SMD(H2O)	gCP	E(wB97X-V//B97-3c), THF	E(wB97X-V//B97-3c), H2O	Imaginary Freq., cm-1		L	Elementary step	∆G/∆G‡ (THF) [kJ/mol]	∆G/∆G‡ (THF) [kJ/mol]		Concentration correction: ideal gas ⟶ 1M solution (at 298.15 K)
	PhBr	-2806.56	-2806.62	-2805.58	-2805.52	-244.626	-244.636	-244.628	0.0071	-2805.52	-2805.52								0.00301879
1	[Pd(PPh3)2]	-2199.62	-2200.1	-2200.59	-2200.11	-1528.58	-1528.62	-1528.59	0.035	-2200.11	-2200.08
1'	[(PhBr)Pd(PPh3)2] - pre-OA adduct	-5006.19	-5006.75	-5006.19	-5005.63	-1773.2	-1773.23	-1773.2	0.0445	-5005.62	-5005.58			PPh3	1⟶1'	34.6073	31.4567
TS1	[(PhBr)Pd(PPh3)2]‡ - OA TS	-5006.17	-5006.73	-5006.17	-5005.61	-1773.18	-1773.22	-1773.18	0.0446	-5005.6	-5005.57	-80.32		PPh3	1⟶TS1	97.3567	81.6037
2	[Ph(Br)Pd(PPh3)2] - OA product	-5006.21	-5006.77	-5006.22	-5005.65	-1773.22	-1773.27	-1773.24	0.0445	-5005.66	-5005.63			PPh3	1⟶2	-59.3856	-79.8645
1	[Pd(PCy3)2]	-2220.93	-2221.83	-2222.39	-2221.49	-1550.17	-1550.2	-1550.17	0.0794	-2221.44	-2221.41
1'	[(PhBr)Pd(PCy)2] - pre-OA adduct	-5027.49	-5028.46	-5027.97	-5027	-1794.79	-1794.83	-1794.79	0.0881	-5026.94	-5026.91			PCy3	1⟶1'	40.6459	44.3216
TS1	[(PhBr)Pd(PCy)2]‡ - OA TS	-5027.46	-5028.44	-5027.95	-5026.97	-1796.55	-1796.59	-1796.55	0.0902	-5026.92	-5026.88	-128.01		PCy3	1⟶TS1	114.16	97.6193
2	[Ph(Br)Pd(PCy)2] - OA product	-5027.5	-5028.48	-5028	-5027.02	-1794.8	-1794.84	-1794.8	0.0912	-5026.96	-5026.93			PCy3	1⟶2	1.78852	-13.1768
1	[Pd(SPos)2]	-3133.35	-3134.37	-3135.41	-3134.38	-2462.59	-2462.63	-2462.6	0.0896	-3134.33	-3134.3
1'	[(PhBr)Pd(SPhos)2] - pre-OA adduct	-5939.89	-5941	-5941	-5939.89	-2707.21	-2707.26	-2707.21	0.0996	-5939.83	-5939.79			SPhos	1⟶1'	64.2754	57.4491
TS1	[(PhBr)Pd(SPhos)2]‡ - OA TS	-5939.87	-5940.99	-5940.97	-5939.86	-2707.18	-2707.23	-2707.19	0.1007	-5939.8	-5939.76	-141.69		SPhos	1⟶TS1	136.477	122.299
2	[Ph(Br)Pd(SPhos)2] - OA product	-5939.91	-5941.02	-5941.02	-5939.9	-2707.21	-2707.26	-2707.22	0.101	-5939.85	-5939.81			SPhos	1⟶2	20.167	8.08972
